# Supplementary material for: Spatial Distribution and Prognostic Implications of Tumor-Infiltrating FoxP3− CD4+ T Cells in Biliary Tract Cancer
Source: PubMed Central journal article supplement — Cancer Res Treat. 2020 Aug 31;53(1):162–71. doi: 10.4143/crt.2020.704 (PMC7812013; doi:10.4143/crt.2020.704), 2020-08-31
Supplement: crt-2020-704-suppl2.pdf [file crt-2020-704-suppl2.pdf]

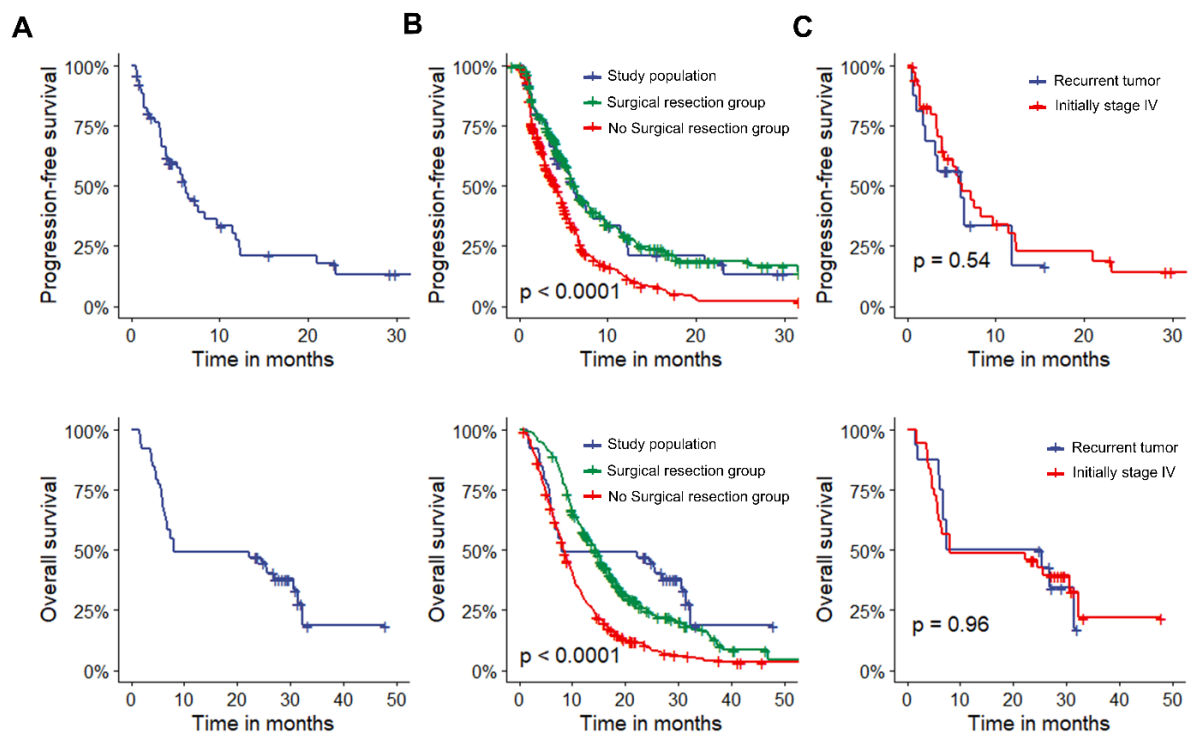

**S2 Fig.** Survival outcomes of the study patients. (A) Kaplan-Meier analyses were performed to estimate the progression-free survival and overall survival of the study cohort. (B) The progression-free survival and overall survival of the study population were compared with those of the subgroups of the source population. (C) Among the patients in the study population, progression-free survival and overall survival were compared according to the initial disease status.
