# Supplementary material for: Spatial Distribution and Prognostic Implications of Tumor-Infiltrating FoxP3− CD4+ T Cells in Biliary Tract Cancer
Source: PubMed Central journal article supplement — Cancer Res Treat. 2020 Aug 31;53(1):162–71. doi: 10.4143/crt.2020.704 (PMC7812013; doi:10.4143/crt.2020.704), 2020-08-31
Supplement: crt-2020-704-suppl3.pdf [file crt-2020-704-suppl3.pdf]

**S3 Table.** Density of T cell subsets in each subsection

|              | <b>CD8<sup>+</sup> cytotoxic T cells</b> | <b>FoxP3<sup>-</sup> CD4<sup>+</sup> helper T cells</b> | <b>FoxP3<sup>+</sup> CD4<sup>+</sup> regulatory T cells</b> |
|--------------|------------------------------------------|---------------------------------------------------------|-------------------------------------------------------------|
| Stroma       | 151.3 (68.7–258.7)                       | 40.6 (15.0–88.1)                                        | 1.8 (0.5–4.0)                                               |
| Tumor margin | 604.8 (305.5–914.1)                      | 145.3 (61.1–323.8)                                      | 10.4 (3.7–25.4)                                             |
| Tumor core   | 174.5 (54.2–277.8)                       | 24.9 (8.9–123.3)                                        | 2.9 (0.5–13.6)                                              |

Data are presented as the median (interquartile range) (cell count/mm<sup>2</sup>).
