# Supplementary figures and images for: Spatial Distribution and Prognostic Implications of Tumor-Infiltrating FoxP3− CD4+ T Cells in Biliary Tract Cancer
Source: PubMed Central journal article supplement — Cancer Res Treat. 2020 Aug 31;53(1):162–71. doi: 10.4143/crt.2020.704 (PMC7812013; doi:10.4143/crt.2020.704), 2020-08-31

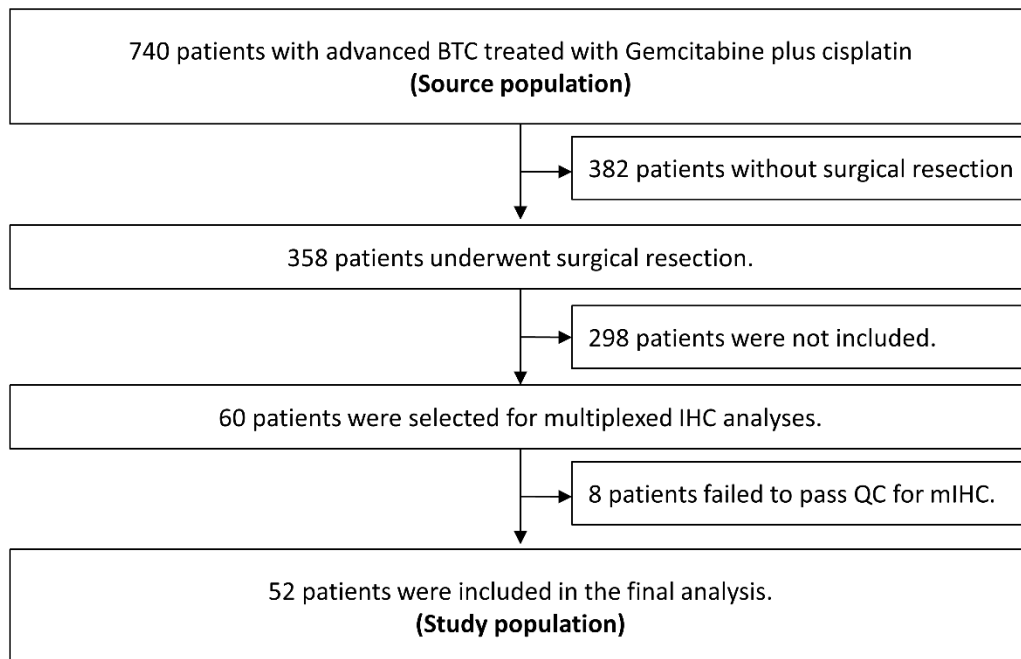

**S1 Fig.** Flow diagram of study patient selection.

Supplement: crt-2020-704-suppl1.pdf [file crt-2020-704-suppl1.pdf]
